# Supplementary material for: Blockade LAT1 Mediates Methionine Metabolism to Overcome Oxaliplatin Resistance under Hypoxia in Renal Cell Carcinoma
Source: MDPI journal article supplement (doi:10.3390/cancers14102551), 2022-05-22
Supplement: s1 [file s1]

# Supplementary Materials: Blockade LAT1 Mediates Methionine Metabolism to Overcome Oxaliplatin Resistance under Hypoxia in Renal Cell Carcinoma

Qingwen Xu, Yuxi Liu, Wen Sun, Tiantian Song, Xintong Jiang, Kui Zeng, Su Zeng, Lu Chen and Lushan Yu

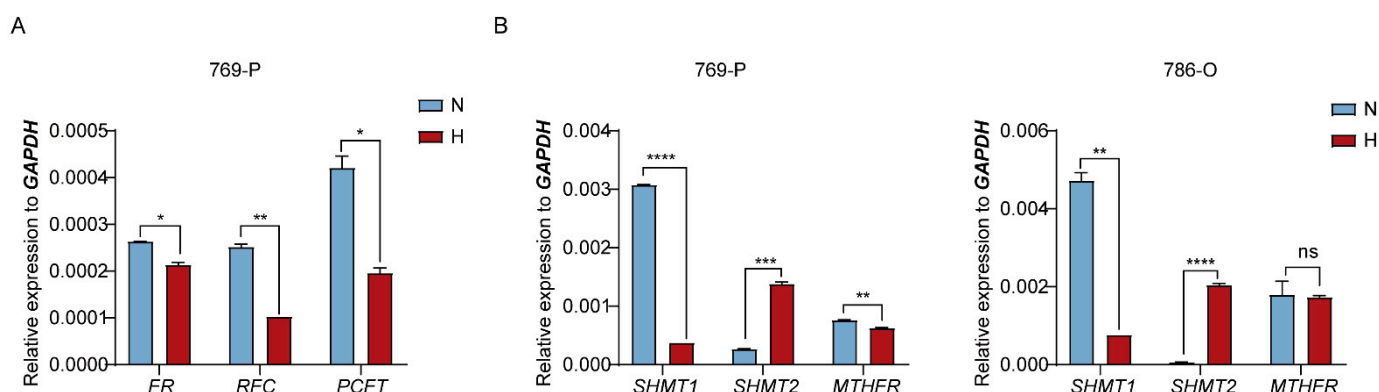

**Figure S1.** The effect of hypoxia on folate metabolism. (A) The mRNA expression of folate transporters (RFC, FR, and PCFT) in 769-P cells exposed in hypoxic and normoxic conditions for 72 h, respectively. RFC: Reduced folate carrier; PCFT: Proton-coupled folate transporter; FR: Folate receptor. (B) The mRNA expression of enzymes (SHMT1, SHMT2, and MTHFR) of folate cycle in 786-O and 769-P cells cultured under normoxia and hypoxia for 72 h, respectively. N, normoxia; H, hypoxia. GAPDH was used as the normalizing gene. Data are the mean  $\pm$  SEM for biological triplicates. Student's *t* test (two-tailed) was used. \*  $p < 0.05$ ; \*\*  $p < 0.01$ ; \*\*\*  $p < 0.001$ ; \*\*\*\*  $p < 0.0001$ . ns: no significance.

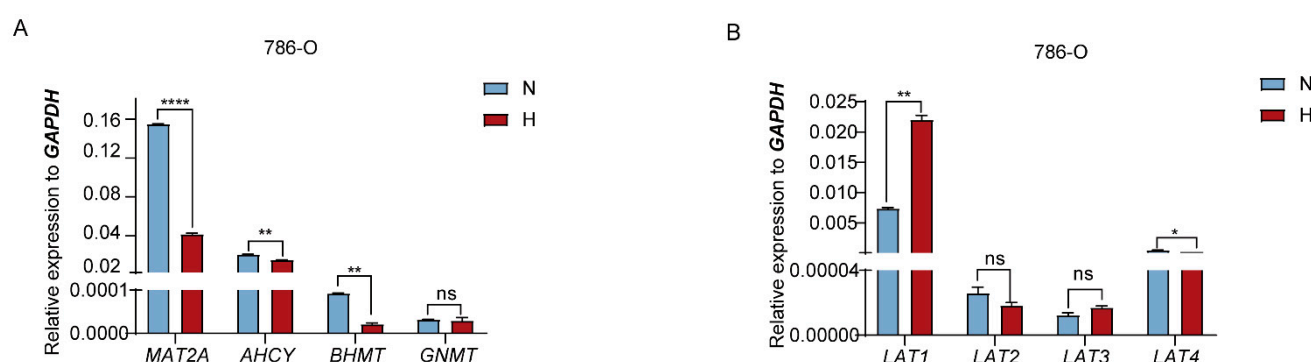

**Figure S2.** Expression level of enzymes and transporters of methionine cycle in RCC cells under hypoxia. (A) The mRNA expression of pivotal enzymes (MAT2A, AHCY, BHMT, and GNMT) of methionine cycle in 786-O cells cultured under normoxia and hypoxia for 72 h, respectively. MAT2A: Methionine adenosyltransferase 2A; GNMT: Glycine N-methyltransferase; AHCY: Adenosylhomocysteinase; BHMT: Betaine-homocysteine S-methyltransferase. (B) The mRNA expression of methionine uptake transporters (LAT1, LAT2, LAT3, and LAT4) in 786-O cells cultured under normoxia and hypoxia for 72 h, respectively. LAT: L-type amino acid transporter. N, normoxia; H, hypoxia. GAPDH was used as the normalizing gene. Data are the mean  $\pm$  SEM for biological triplicates. Student's *t* test (two-tailed) was used. \*  $p < 0.05$ ; \*\*  $p < 0.01$ ; \*\*\*\*  $p < 0.0001$ . ns: no significance.

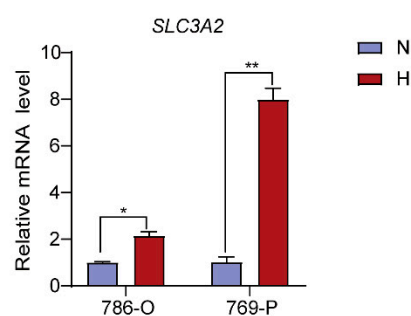

**Figure S3.** The mRNA level of *SLC3A2* in 786-O and 769-P cells cultured under normoxia and hypoxia for 72 h, respectively. N, normoxia; H, hypoxia. *GAPDH* was used as the normalizing gene. Data are the mean  $\pm$  SEM for biological triplicates. Student's *t* test (two-tailed) was used. \*  $p < 0.05$ ; \*\*  $p < 0.01$ .

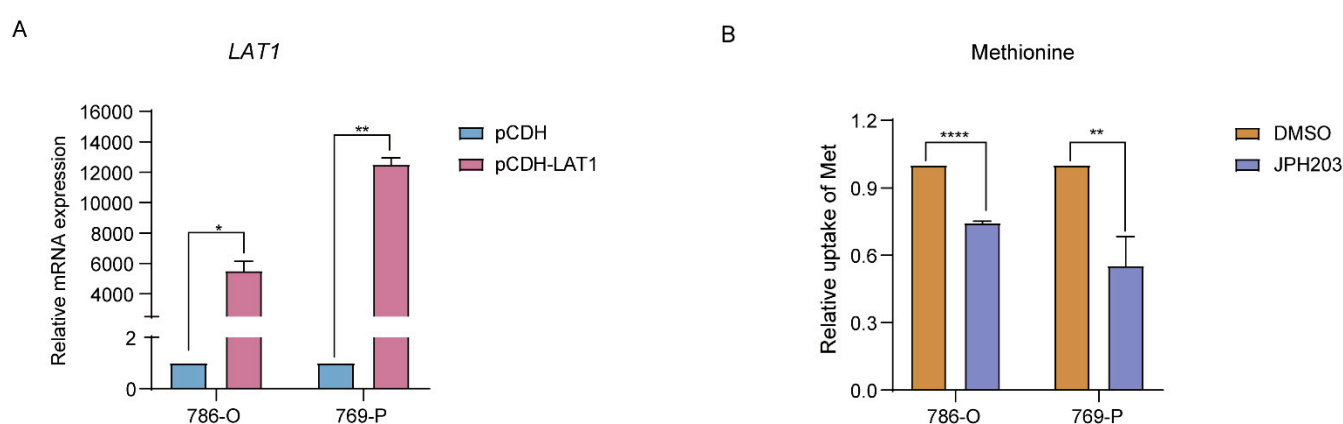

**Figure S4.** Efficiency of overexpression and inhibition of LAT1 in RCC cells. (A) The mRNA expression of *LAT1* in 769-P and 786-O cells with LAT1 overexpression (versus vector). *GAPDH* was used as the normalizing gene. (B) Relative methionine uptake was examined using LC-MS in 769-P and 786-O cells treated with 10  $\mu$ mol/L JPH203 (versus DMSO) for 72 h. Met: methionine. Data are the mean  $\pm$  SEM for biological triplicates. Student's *t* test (two-tailed) was used. \*  $p < 0.05$ ; \*\*  $p < 0.01$ ; \*\*\*\*  $p < 0.0001$ .

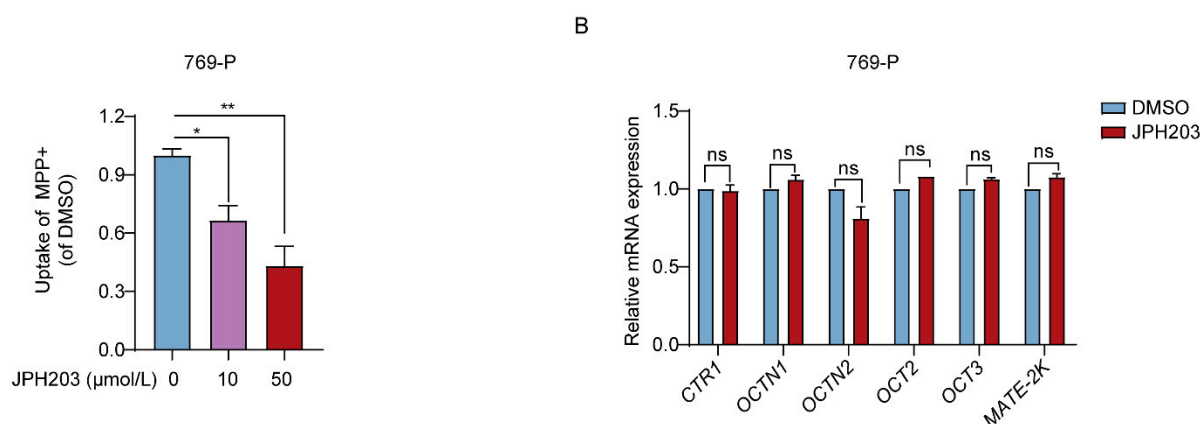

**Figure S5.** The expression and uptake capacity of transporter of oxaliplatin in RCC cells after being treated with JPH203 (A) The uptake of MPP<sup>+</sup> (1-methyl-4-phenylpyridinium) was examined in 769-P cells after being treated with JPH203 (0, 10, 50  $\mu$ mol/L). (B) The mRNA expression of organic cation/carnitine transporters (*OCTN1* and *OCTN2*), organic cation transporters (*OCT2* and *OCT3*), high affinity copper uptake protein (*CTR1*), and multidrug and toxin extrusion protein (*MATE-2K*) in 769-P cells after being treated with 10  $\mu$ mol/L JPH203. *GPADH* was used as the normalizing gene.

Data are the mean  $\pm$  SEM for biological triplicates. Student's *t* test (two-tailed) was used. \*  $p < 0.05$ ; \*\*  $p < 0.01$ . ns: no significance.

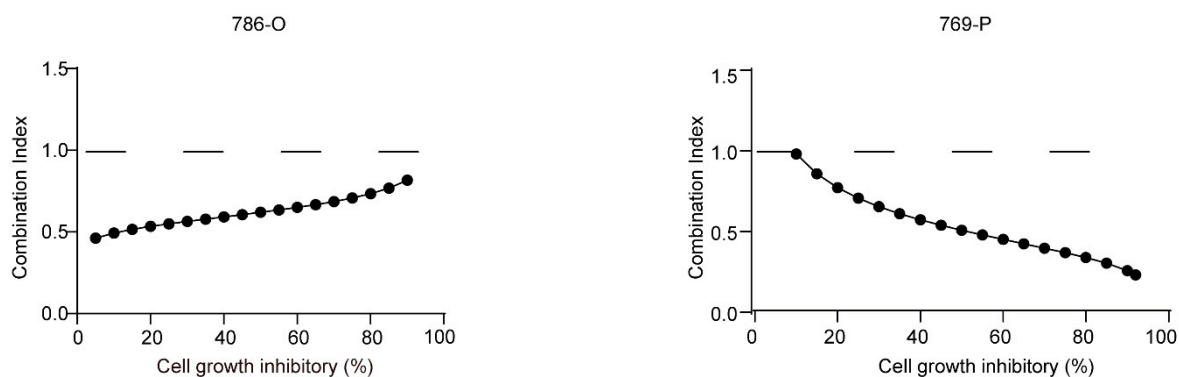

**Figure S6.** Combination index–fraction affected plots of JPH203 and oxaliplatin combinations in 786-O and 769-P cells. Combination index (CI) < 1 represents synergism.

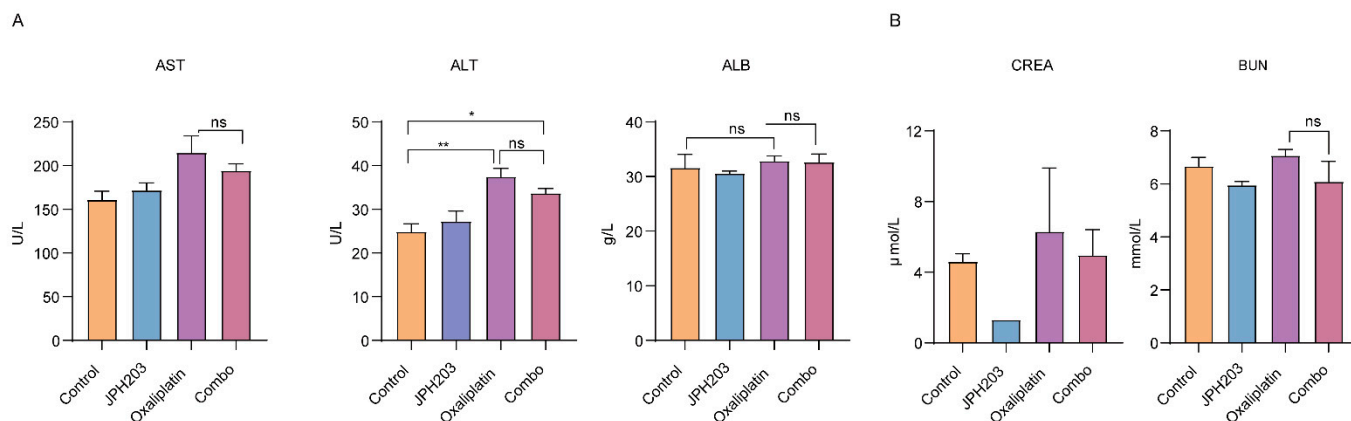

**Figure S7.** The biocompatibility of combination strategy. (A) The amount of AST (Aspartate aminotransferase), ALT (Alanine transaminase), and ALB (Albumin) in plasma of mice bearing different drug treatment. (B) The amount of CREA (Creatinine) and BUN (Blood urea nitrogen) in plasma of mice bearing different drug treatment. Combo: JPH203 in combination with oxaliplatin. Data are the mean  $\pm$  SEM for biological triplicates. One-way ANOVA analysis was used. \*  $p < 0.05$ ; \*\*  $p < 0.01$ ; ns, no significance.

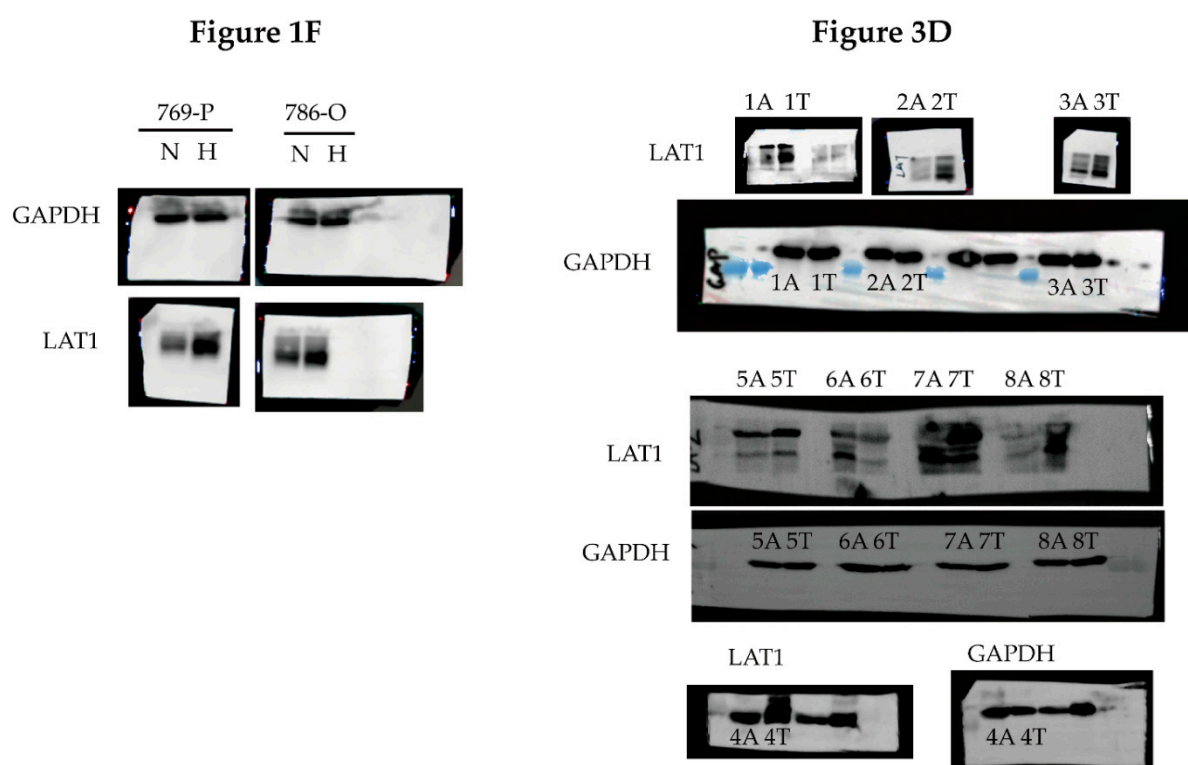

**Figure S8.** Original western blots of Figure 1F and Figure 3D.

**Table S1.** Primers used in this study.

| Gene         | Forward (5' to 3')      | Reverse (5' to 3')     |
|--------------|-------------------------|------------------------|
| <i>GAPDH</i> | AGGTGAAGGTCGGAGTCA      | GGTCATTGATGGCAACAA     |
| <i>LAT1</i>  | GCATCGGCTTCACCATCATC    | ACCACCTGCATGAGCTTCTGAC |
| <i>PCFT</i>  | AGAGCTGGACAATGGATCGGT   | GCCTTGCTGATAGCCATGACTC |
| <i>RFC</i>   | GGGCTTTGTTGCTGGAAG      | GGCAGAAAGGATTTGTCTCAAG |
| <i>SHMT1</i> | CGCAGAGTGCACCTTCCTGA    | CACTGGTTCGAAGCTGCCTA   |
| <i>SHMT2</i> | CTGCAGGAAGACCCTCTTGT    | CGGAGTAGGGCTGGACATTG   |
| <i>AHCY</i>  | TAGCAGGCTATGGTGATGTGG   | ATGGGGTCAATCTCGGTGATG  |
| <i>MTHFR</i> | CCGCCGTGAACTACTGTGG     | AGATGGCCCGTGATCTCCTC   |
| <i>MAT2A</i> | ACCAGAAAGTGGTTCGTGAAG   | CAAGGCTACCAGCACGTTACA  |
| <i>GNMT</i>  | GTATATCGGAGAGACACCCGCAG | CACTCTGGTCCCCTTTGCAG   |
| <i>BHMT</i>  | TGCTGGAGAGATTGTGATTGGA  | CTTGCTTCACTCGCATAGAAGG |
| <i>FR</i>    | TTAGCCTGGCCCTAATGCT     | GCAGGGATTTCCAGGTATCA   |

**Table S2.** Tissue specimen information.

| Number | Gender | Age | Subtype                             | TNM stage |
|--------|--------|-----|-------------------------------------|-----------|
| 1      | Male   | 37  | Clear cell renal cell carcinoma     | T1bN0M1   |
| 2      | Male   | 70  | Papillary cell renal cell carcinoma | T1bN0M0   |
| 3      | Male   | 71  | Clear cell renal cell carcinoma     | T4aN2M0   |
| 4      | Female | 51  | Clear cell renal cell carcinoma     | T2aN0M0   |
| 5      | Female | 43  | Clear cell renal cell carcinoma     | T1aN0M0   |
| 6      | Male   | 58  | Clear cell renal cell carcinoma     | T1bN0M0   |
| 7      | Male   | 50  | Clear cell renal cell carcinoma     | T3N0M0    |
| 8      | Male   | 52  | Clear cell renal cell carcinoma     | T4N1M0    |
